# Supplementary material for: Thermomechanical properties of confined magnetic nanoparticles in electrospun polyacrylonitrile nanofiber matrix exposed to a magnetic environment: structure, morphology, and stabilization (cyclization)
Source: Royal Society of Chemistry journal article supplement (doi:10.1039/d4na00631c), 2024-01-01
Supplement: d4na00631c1.pdf [file d4na00631c1.pdf]

## Supplementary Material

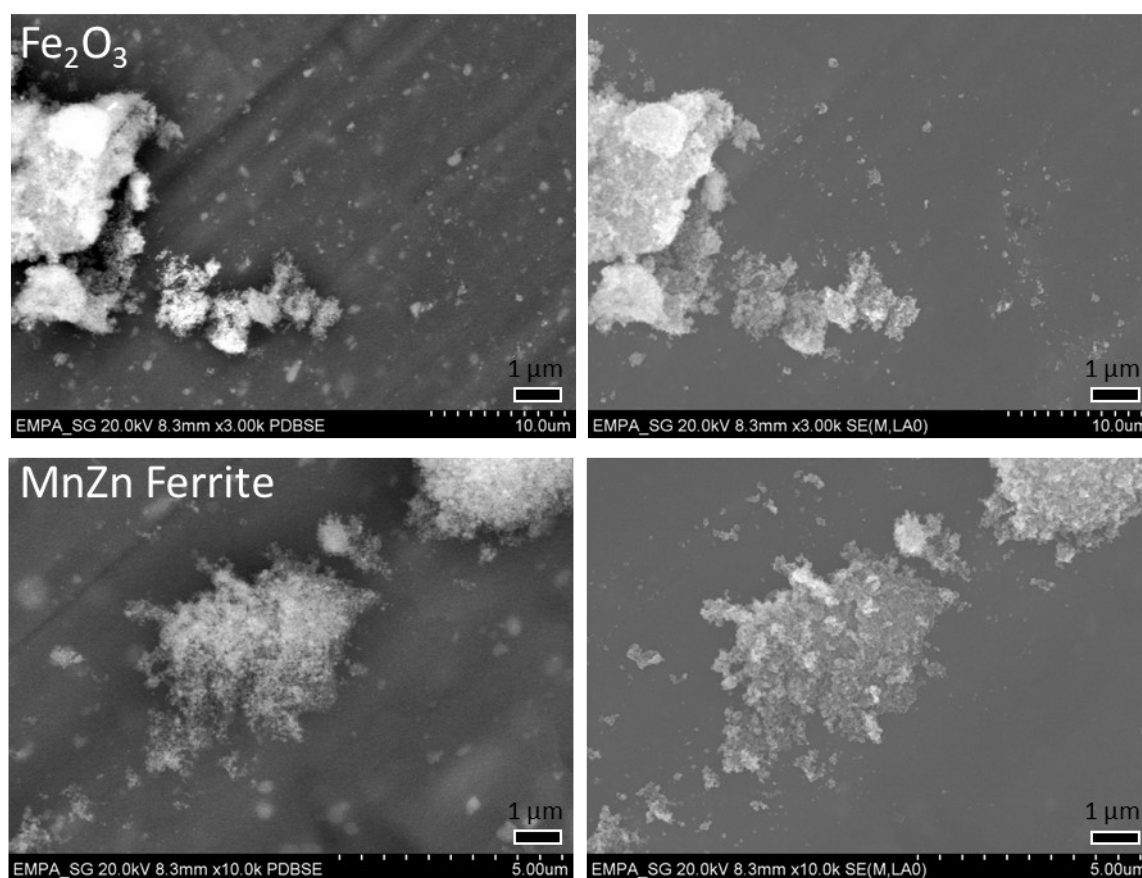

**Figure S1** – Backscatter (left column) and secondary (right column) electron imaging of the  $\text{Fe}_2\text{O}_3$  (top) and MnZn Ferrite (bottom) nanoparticles.

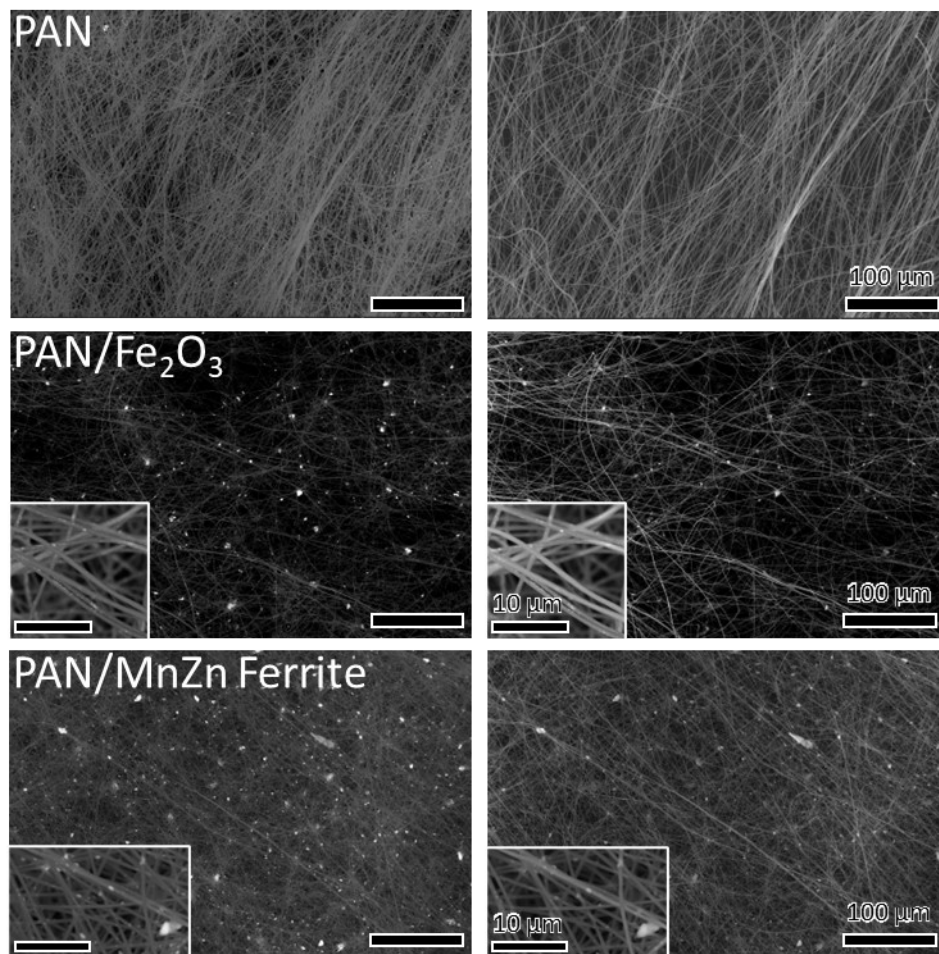

**Figure S2** – Backscatter (left column) and secondary (right column) electron imaging of the PAN (top), PAN/Fe<sub>2</sub>O<sub>3</sub> (middle) and PAN/MnZn Ferrite (bottom) nanofibers.

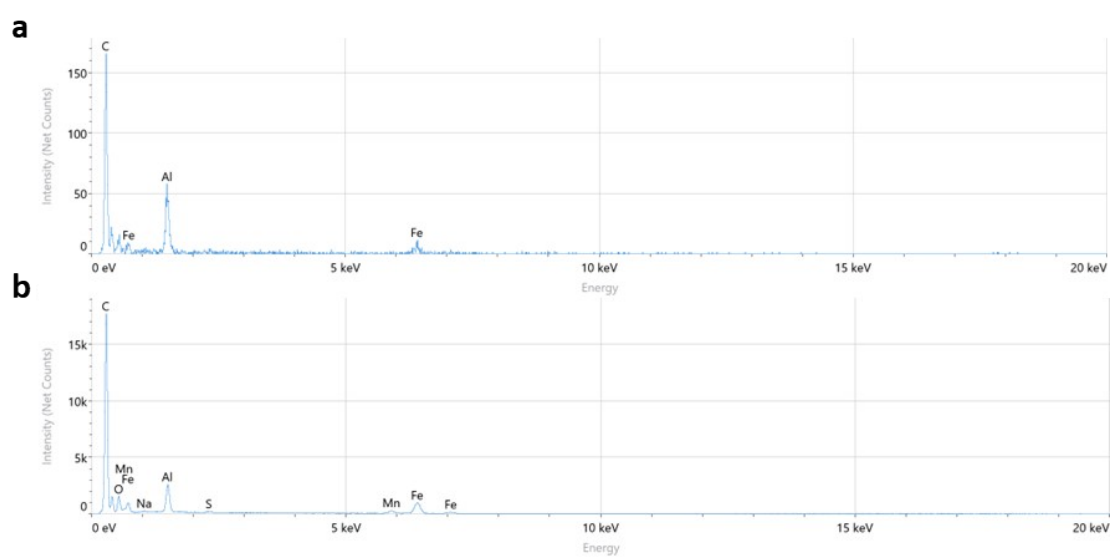

**Figure S3** – EDX spectra of the (a) PAN/Fe<sub>2</sub>O<sub>3</sub> and (b) PAN/MnZn Ferrite nanofibers.

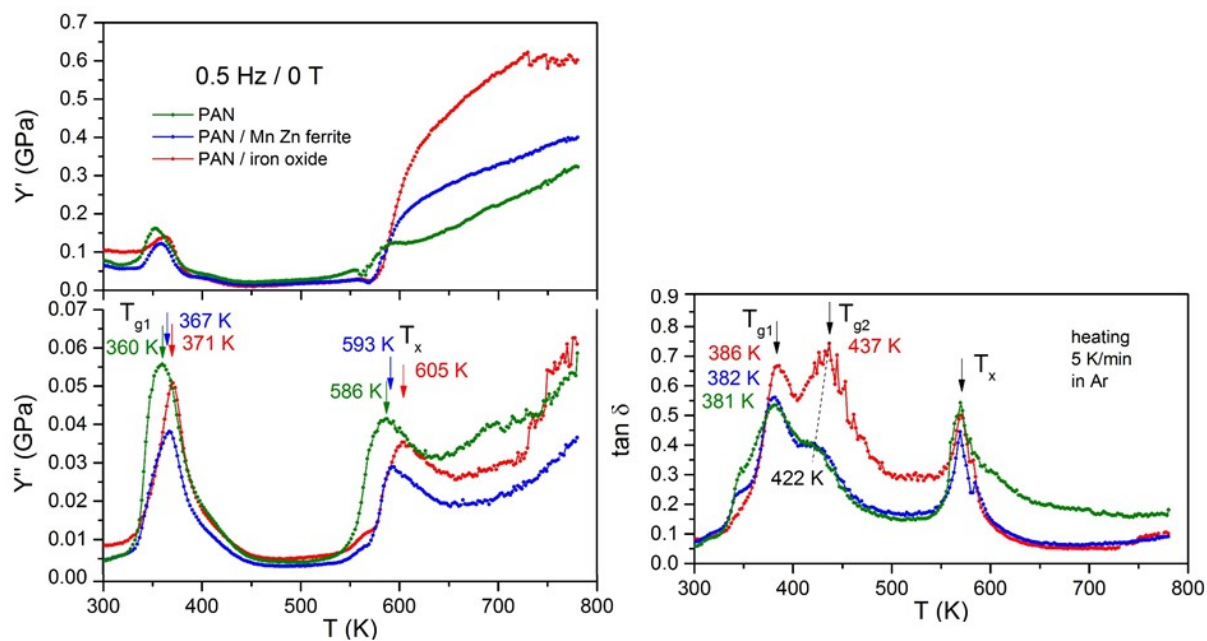

**Figure S4** – Comparison of PAN, PAN/MnZn Ferrite and PAN/Fe<sub>2</sub>O<sub>3</sub> samples performed at 0.5 Hz at 0 T.

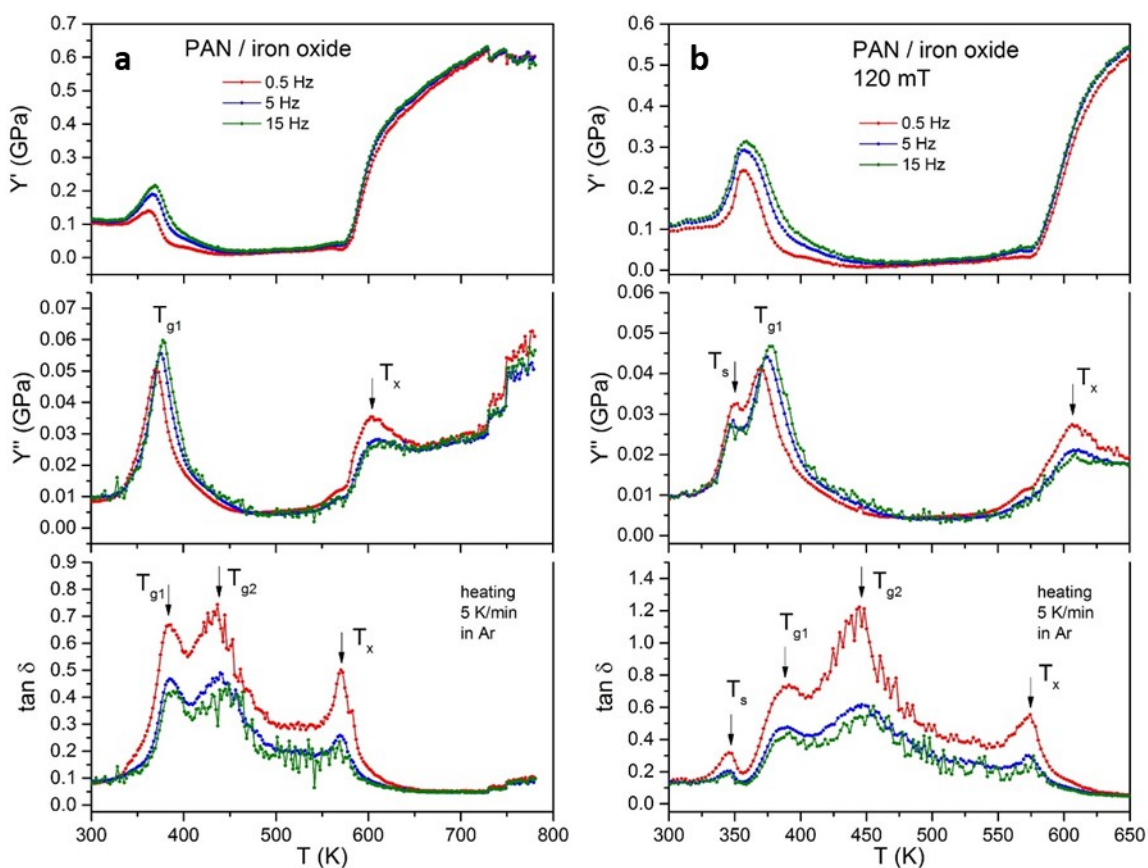

**Figure S5** – DMA (storage and loss modulus,  $\tan \delta$ ) of PAN/Fe<sub>2</sub>O<sub>3</sub> samples at 3 different frequencies at a heating rate of 5 K min<sup>-1</sup>.

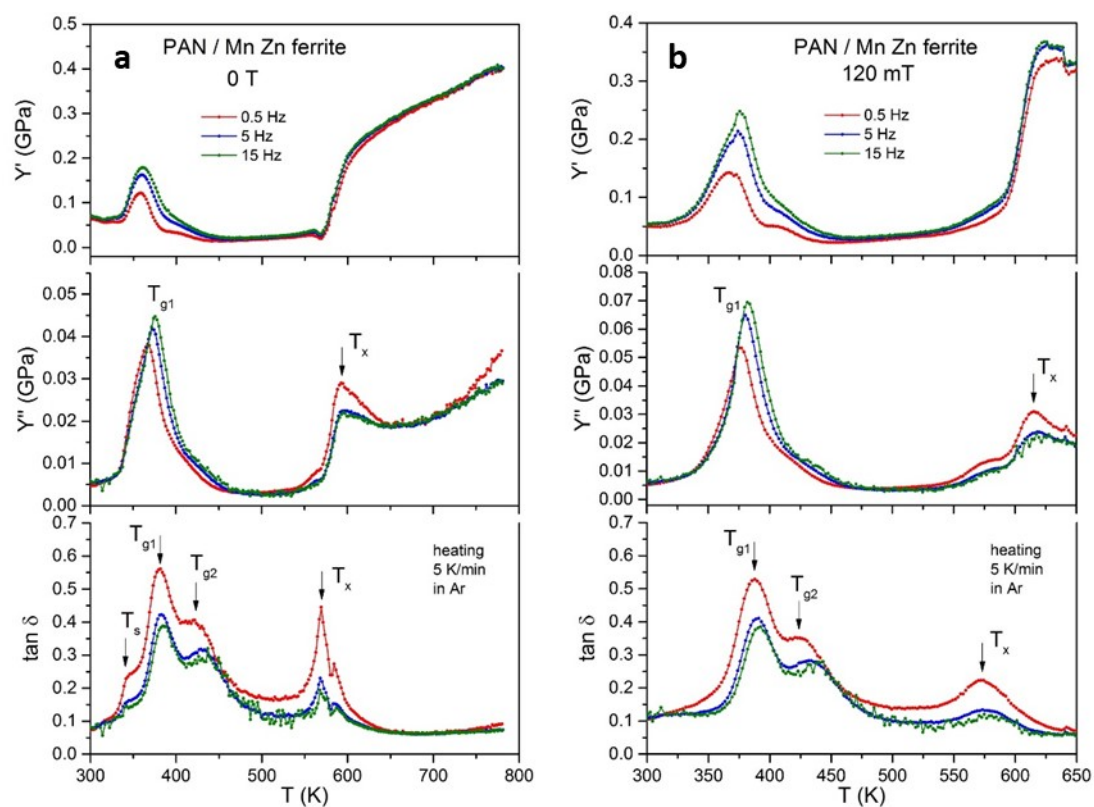

**Figure S6** – DMA (storage and loss modulus,  $\tan\delta$ ) of PAN/MnZn Ferrite samples at 3 different frequencies at a heating rate of  $5 \text{ K min}^{-1}$ .

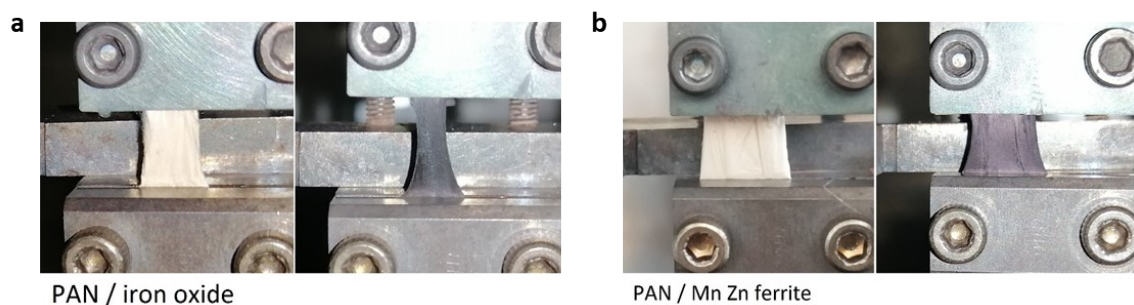

**Figure S7** – (a) PAN/ $\text{Fe}_2\text{O}_3$  and (b) PAN/MnZn Ferrite samples before and after DMA.
